# Supplementary material
Source: PubMed Central journal article supplement (PMC5238942)
Supplement: NIHMS70062-supplement-Supplementary_Tables_1-9.pdf [file NIHMS70062-supplement-Supplementary_Tables_1-9.pdf]

## **Supplementary Information**

### **Content:**

- **Supplementary Tables 1 - 9**

**Supplementary Table 1. Pairwise  $F_{ST}$  values between MTBC Lineage 4 sublineages.** Numbers in brackets are values with  $p \geq 0.05$ . All other values were statistically significant ( $p < 0.05$ ). P-values obtained by permutation (see Online Methods).

|        | L4.1.1 | L4.1.3 | L4.1.2 | L4.2  | L4.3  | L4.4  | L4.5  | L4.6.1 | L4.6.2 | L4.10 |
|--------|--------|--------|--------|-------|-------|-------|-------|--------|--------|-------|
| L4.1.1 | 0      |        |        |       |       |       |       |        |        |       |
| L4.1.3 | 0.408  | 0      |        |       |       |       |       |        |        |       |
| L4.1.2 | 0.432  | 0.683  | 0      |       |       |       |       |        |        |       |
| L4.2   | 0.387  | 0.448  | 0.527  | 0     |       |       |       |        |        |       |
| L4.3   | 0.510  | 0.631  | 0.630  | 0.413 | 0     |       |       |        |        |       |
| L4.4   | 0.417  | (0.57) | 0.590  | 0.330 | 0.430 | 0     |       |        |        |       |
| L4.5   | 0.471  | (0.63) | 0.649  | 0.387 | 0.500 | 0.389 | 0     |        |        |       |
| L4.6.1 | 0.486  | 0.679  | 0.660  | 0.414 | 0.510 | 0.411 | 0.471 | 0      |        |       |
| L4.6.2 | 0.523  | (0.67) | 0.692  | 0.455 | 0.563 | 0.471 | 0.509 | 0.508  | 0      |       |
| L4.10  | 0.487  | 0.588  | 0.594  | 0.429 | 0.482 | 0.389 | 0.437 | 0.427  | 0.499  | 0     |

## Supplementary Table 2. Sublineage-specific SNPs and oligonucleotides used for MOL-PCR.

| MTBC Sublineage | Alternative SNP Name | SNP     | Reference Allele | Mutant Allele | Gene           | Ess/Syn       | Sense      | Oligonucleotide | Bead Region | Sequence                                                                                                                                                               |
|-----------------|----------------------|---------|------------------|---------------|----------------|---------------|------------|-----------------|-------------|------------------------------------------------------------------------------------------------------------------------------------------------------------------------|
| L4.1.1          | X                    | 3798451 | C                | G             | Rv3383c (idsB) | noness/syn    | sense      | LPO_ancestral   | 29          | <u>GGGTTCCCTAAGGGTTGGATACTACTTCTATAAECTCACCTAAAAATGCTTTCCCAAGGTCAGCAGGGACACTC</u>                                                                                      |
|                 |                      |         |                  |               |                |               |            | LPO_mutant RPO  | 28          | <u>GGGTTCCCTAAGGGTTGGACACTTAATTCATTCTAAATCTATCAATGCTTTCCCAAGGTCAGCAGGGACACTC</u><br>P-CCCAGAAAAGCCGCATCCAGAGTCAATATCTAGATTGGATCTTGCTGGCAC                              |
| L4.1.3          | Ghana                | 4409231 | T                | G             | Rv3921c        | ess/nonsyn    | sense      | LPO_ancestral   | 27          | <u>GGGTTCCCTAAGGGTTGGATAAECTTACACTTAACTATCATCTTCTGCTTTTTGGCCTCCTCCT</u>                                                                                                |
|                 |                      |         |                  |               |                |               |            | LPO_mutant RPO  | 12          | <u>GGGTTCCCTAAGGGTTGGACATAATCAATTTCAACTTTCTACTCCTGCTTTTTGGCCTCCTCCG</u><br>P-CCTTTTCGATCATGCCGAAGACGTAATGCTCTAGATTGGATCTTGCTGGCAC                                      |
| L4.1.2          | Haarlem              | 3013784 | C                | G             | Rv2697c (dut)  | ess/nonsyn    | anti-sense | LPO_ancestral   | 14          | <u>GGGTTCCCTAAGGGTTGGAATTTCTTCTCTTTCTTTCACAATAGTTGCTAGTGCAACGGGTTGAGTTGG</u>                                                                                           |
|                 |                      |         |                  |               |                |               |            | LPO_mutant RPO  | 30          | <u>GGGTTCCCTAAGGGTTGGACTTAACTTTAACTTCTATAACACAGTTGCTAGTGCAACGGGTTGAGTTGG</u><br>P-TCGAGCTGGTCGAGGCTCGTCTGCTTTCTAGATTGGATCTTGCTGGCAC                                    |
| L4.2            |                      | 2181026 | G                | C             | Rv1928c        | noness/syn    | sense      | LPO_ancestral   | 33          | <u>GGGTTCCCTAAGGGTTGGAACACTTATTCTCAAACCTAATATGCTGGCTCACATCGCAGCAGACC</u>                                                                                               |
|                 |                      |         |                  |               |                |               |            | LPO_mutant RPO  | 15          | <u>GGGTTCCCTAAGGGTTGGATACTTCTTTACTACAATTTACAACCTGCTGGCTCACATCGCAGCAGACC</u><br>P-GGCAGACCTTGCCACCTGATGTCTAGATTGGATCTTGCTGGCAC                                          |
| L4.3            | LAM                  | 1480024 | G                | T             | Rv1318c        | noness/nonsyn | anti-sense | LPO_ancestral   | 20          | <u>GGGTTCCCTAAGGGTTGGACTTTCTCATACTTTCAACTAATTTGCTGATCATCTCGATGGTCACATTGGTGTTG</u>                                                                                      |
|                 |                      |         |                  |               |                |               |            | LPO_mutant RPO  | 21          | <u>GGGTTCCCTAAGGGTTGGATCAAACCTCAATTTCTACTTAACTGCTGATCATCTCGATGGTCACATTGGTGTTG</u><br>P-GGGTTTATCCTGATGTGGATCCTGGCCTTCTAGATTGGATCTTGCTGGCAC                             |
| L4.4            |                      | 3966059 | G                | C             | Rv3529c        | noness/nonsyn | anti-sense | LPO_ancestral   | 36          | <u>GGGTTCCCTAAGGGTTGGAATTAACAACCTTAACTACACAAACTTGATTGCCGATCCGCTGGGTAC</u>                                                                                              |
|                 |                      |         |                  |               |                |               |            | LPO_mutant RPO  | 37          | <u>GGGTTCCCTAAGGGTTGGATACAACATCTCATTAACTATACAACCTTGATTGCCGATCCGCTGGGTAC</u><br>P-GGTGGCAGATATCTACCGGCCTTCTGCTAGATTGGATCTTGCTGGCAC                                      |
| L4.5            |                      | 2789341 | A                | C             | Rv2483c (plsC) | ess/nonsyn    | anti-sense | LPO_ancestral   | 18          | <u>GGGTTCCCTAAGGGTTGGAACACTTATCTTTCAATTTCAATTACATCGCCGAAGGCCAAACCCAGCGAATCTAAGAT</u>                                                                                   |
|                 |                      |         |                  |               |                |               |            | LPO_mutant RPO  | 22          | <u>GGGTTCCCTAAGGGTTGGACAAACAAACATTTCAATATCAATCATCGCCGAAGGCCAAACCCAGCGAATCTAAGAG</u><br>P-CGCTGGCAAGGATGGTGAGGCCCTCCGCATCGCCAAGCTCTATCTAGATTGGATCTTGCTGGCAC             |
| L4.6.1          | Uganda               | 990626  | T                | A             | Rv0890c        | noness/nonsyn | sense      | LPO_ancestral   | 34          | <u>GGGTTCCCTAAGGGTTGGAACCTTATTTCTTCACTACTATATCAATCGCATCACCTCCTGCCAGGGCT</u>                                                                                            |
|                 |                      |         |                  |               |                |               |            | LPO_mutant RPO  | 35          | <u>GGGTTCCCTAAGGGTTGGACATCTTCTATATCAATTTCTTATTATCGCATCACCTCCTGCCAGGGCA</u><br>P-AACTGCCGCATCAGGACTGGTGCATCTAGATTGGATCTTGCTGGCAC                                        |
| L4.6.2          | Cameroon             | 3191099 | C                | A             | Rv2881c (cdaA) | ess/nonsyn    | anti-sense | LPO_ancestral   | 19          | <u>GGGTTCCCTAAGGGTTGGAATTAATTTACAACAAATAACACACCGCAATGCTGGTCTACCCGAAAAATG</u>                                                                                           |
|                 |                      |         |                  |               |                |               |            | LPO_mutant RPO  | 25          | <u>GGGTTCCCTAAGGGTTGGACTTTCTTAATACATTACAACATACCGCAATGCTGGTCTACCCGAAAAAT</u><br>P-GCTCGGGATGGGTGTTCTGCATGATGATTCTAGATTGGATCTTGCTGGCAC                                   |
| L4.10           | PGG3                 | 1692141 | C                | A             | Rv1501         | noness/syn    | sense      | LPO_ancestral   | 13          | <u>GGGTTCCCTAAGGGTTGGACAAATACATAATCTTACATTTCACTCGACTCATGATGAAGTATGACCCCTATTTC-TTTACCTTTCTTGAATC</u>                                                                    |
|                 |                      |         |                  |               |                |               |            | LPO_mutant RPO  | 26          | <u>GGGTTCCCTAAGGGTTGGATACATTCAACACTCTTAAATCAAACGACTCATGATGAAGTATGACCCCTATTTC-TTTACCTTTCTTGAATA</u><br>P-CCCAGATCCTAAGCATCGTTGATCGTGTGCTACTGAAACTCTAGATTGGATCTTGCTGGCAC |

**Supplementary Table 3. Lineage 4-specific and sublineage-specific SNPs interrogated with Sequenom MassARRAY.**

| Sublineage       | Genomic position of<br>SNP in H37Rv | Ancestral<br>base | Mutant base | Gene (nt gene) |
|------------------|-------------------------------------|-------------------|-------------|----------------|
| L4.1.1 (X)       | 1960391                             | G                 | A           | Rv1733c_0097n  |
| L4.1.1 (X)       | 2603797                             | G                 | A           | Rv2330c_0426s  |
| L4.1.1 (X)       | 3597737                             | C                 | T           | Rv3221c_0030s  |
| L4.1.2 (Haarlem) | 4352475                             | G                 | A           | Rv3874_0202n   |
| L4.1.2 (Haarlem) | 891756                              | A                 | G           | Rv0798c_0514s  |
| L4.1.2 (Haarlem) | 1477588                             | G                 | C           | Rv1316c_0044n  |
| L4.3 (LAM)       | 157292                              | C                 | T           | Rv0129c_0309s  |
| L4.3 (LAM)       | 2134215                             | T                 | C           | Rv1884c_0047n  |
| L4.4*            | 3311442                             | G                 | A           | Rv2958c_0559n  |
| L4.5             | 7892                                | G                 | A           | Rv0006_0591s   |
| L4.5             | 12555                               | C                 | T           | Rv0009_0088s   |
| L4.10 (PGG3)     | 7585                                | C                 | G           | Rv0006_0284n   |
| L4.10 (PGG3)     | 1960284                             | A                 | C           | Rv1733c_0204n  |

\* not specific for all strains of L4.4, but only for a subsublineage of L4.4

**Supplementary Table 4. PCR primers for amplification and Sanger sequencing of regions flanking Lineage 4 sublineage-specific SNPs.**

| Sublineage | SNP     | Forward Primer           | Reverse Primer           | Amplification Fragment Length |
|------------|---------|--------------------------|--------------------------|-------------------------------|
| L4.1.1     | 3798451 | TTGTGCACCAACTCCACAGCCG   | CGTGTCTTTCTGTAGTGGATGACC | 518bp                         |
| L4.1.3     | 4409231 | AGGATTGTCAACGTTTGC GT    | GGATGCGTTCGTCGATTT CAG   | 563bp                         |
| L4.1.2     | 3013784 | GCGTGTCCGGCCTTGC GTTTG   | CCGGCGTTGATCTCTACAGC     | 522bp                         |
| L4.2       | 2181026 | CGCCTTGGAGGCGCAGTAGTGG   | GGCATGTGATTCCATCAGGTATC  | 557bp                         |
| L4.3       | 1480024 | GCCGGCTGGTCACCAATTGCGTC  | GTTCCGCCGCCAGGCGCTCGAG   | 542bp                         |
| L4.4       | 3966059 | CGGGCAAATTGCGTATCTGC     | GGTACTAAAGAATCCGAGTCATC  | 531bp                         |
| L4.5       | 2789341 | TAGAACGGTCCTCGCCAGATTG   | GCAACTCCACCACGATCAATC    | 656bp                         |
| L4.6.1     | 990626  | CGGACACCTTCGGAGT GACTG   | GCCCAGGTGCTGGCGTATTGC    | 500bp                         |
| L4.6.2     | 3191099 | CACGTTTGACCTGCGACTCCAC   | CCTTGGTCGCTACCCATGAG     | 603bp                         |
| L4.10      | 1692141 | AGGTGAATAAGCGTAGCATGATTC | GCGCGAGGTAGGTATGGTCC     | 540bp                         |

**Supplementary Table 5. Distribution of MTBC Lineage 4 clinical isolates per country and per sublineage.**

See separate Excel file.

**Supplementary Table 6. Number of fixed nonsynonymous SNPs (nsSNPs) predicted be functional among generalist and specialist sublineages.**

| Gene Category <sup>1</sup> | # nsSNPs Generalists | # nsSNPs Specialists |
|----------------------------|----------------------|----------------------|
| Cell Wall & Cell Processes | 15                   | 10                   |
| Information Pathways       | 7                    | 9                    |
| Lipid Metabolism           | 6                    | 14                   |
| Regulatory Proteins        | 1                    | 2                    |
| Virulence                  | 3                    | 2                    |

<sup>1</sup> Gene categories were defined as in <http://tuberculist.epfl.ch/>.

Supplementary Information Stucki et al.

**Supplementary Table 7. Whole genome sequence data accession codes.**

See separate Excel file.

**Supplementary Table 8. Characteristics of genetic diversity found in the generalist and specialist sublineages.**

| Sublineage     | Number of strains | Number of mutations <sup>1</sup> | SS <sup>2</sup> | Categories    | nsSNP | sSNP | nsSNP/sSNP | $\chi^2$ | p-value | NS mean pw dist <sup>3</sup> | S mean pw dist <sup>3</sup> |
|----------------|-------------------|----------------------------------|-----------------|---------------|-------|------|------------|----------|---------|------------------------------|-----------------------------|
| L4.6.1/Uganda  | 203               | 8054                             | 7567.00         | Epitopes      | 28    | 26   | 1.08       | 1.61     | 0.203   | 0.35                         | 0.62                        |
|                |                   |                                  |                 | Nonepitopes   | 389   | 243  | 1.60       |          |         |                              |                             |
|                |                   |                                  |                 | Essentials    | 1027  | 700  | 1.47       | 14.71    | 0.000   | 23.9                         | 15.89                       |
|                |                   |                                  |                 | Nonessentials | 3104  | 1694 | 1.83       |          |         |                              |                             |
| L4.10/PGG3     | 301               | 25678                            | 25192.00        | Epitopes      | 123   | 63   | 1.95       | 0.41     | 0.52    | 1.82                         | 1.33                        |
|                |                   |                                  |                 | Nonepitopes   | 1261  | 726  | 1.74       |          |         |                              |                             |
|                |                   |                                  |                 | Essentials    | 3450  | 2329 | 1.48       | 29.25    | 0.000   | 42.88                        | 27.60                       |
|                |                   |                                  |                 | Nonessentials | 10234 | 5826 | 1.76       |          |         |                              |                             |
| L4.3/LAM       | 293               | 19714                            | 18930.00        | Epitopes      | 77    | 43   | 1.79       | 0.09     | 0.755   | 1.22                         | 0.43                        |
|                |                   |                                  |                 | Nonepitopes   | 915   | 540  | 1.69       |          |         |                              |                             |
|                |                   |                                  |                 | Essentials    | 2597  | 1680 | 1.55       | 11.05    | 0.001   | 37.07                        | 27.49                       |
|                |                   |                                  |                 | Nonessentials | 7544  | 4347 | 1.74       |          |         |                              |                             |
| L4.1.2/Haarlem | 228               | 15567                            | 15108.00        | Epitopes      | 61    | 45   | 1.36       | 1.12     | 0.29    | 0.97                         | 1.12                        |
|                |                   |                                  |                 | Nonepitopes   | 730   | 424  | 1.72       |          |         |                              |                             |
|                |                   |                                  |                 | Essentials    | 2064  | 1441 | 1.43       | 20.48    | 0.000   | 30.27                        | 20.90                       |
|                |                   |                                  |                 | Nonessentials | 6041  | 3511 | 1.72       |          |         |                              |                             |

<sup>1</sup> Number of SNP with respect to the reconstructed ancestor sequence of MTBC.

<sup>2</sup> Number of polymorphic sites within each sublineage.

<sup>3</sup> Number of mean pairwise distances for nonsynonymous (NS) and synonymous (S) mutations.

**Supplementary Table 9. Description of epitopes containing nonsingleton nonsynonymous mutations in the four sublineages analysed.**

See separate Excel file.
